# Supplementary material for: Energy-Density Improvement in Li-Ion Rechargeable Batteries Based on LiCoO2 + LiV3O8 and Graphite + Li-Metal Hybrid Electrodes
Source: MDPI journal article supplement (doi:10.3390/ma12122025), 2019-06-24
Supplement: s1 [file s1]

Supplementary file

# Energy-Density Improvement in Li-Ion Rechargeable Batteries Based on $\text{LiCoO}_2 + \text{LiV}_3\text{O}_8$ and Graphite + Li-Metal Hybrid Electrodes

Ki Yoon Bae, Sung Ho Cho, Byung Hyuk Kim, Byung Dae Son and Woo Young Yoon\*

Department of Materials Science and Engineering, Korea University, 1, 5Ga Anam-dong, Sungbuk-gu, Seoul 136-701, Republic of Korea

\* Correspondence: Tel: +82 2 3290 3274, E-mail: [wyyoon@korea.ac.kr](mailto:wyyoon@korea.ac.kr)

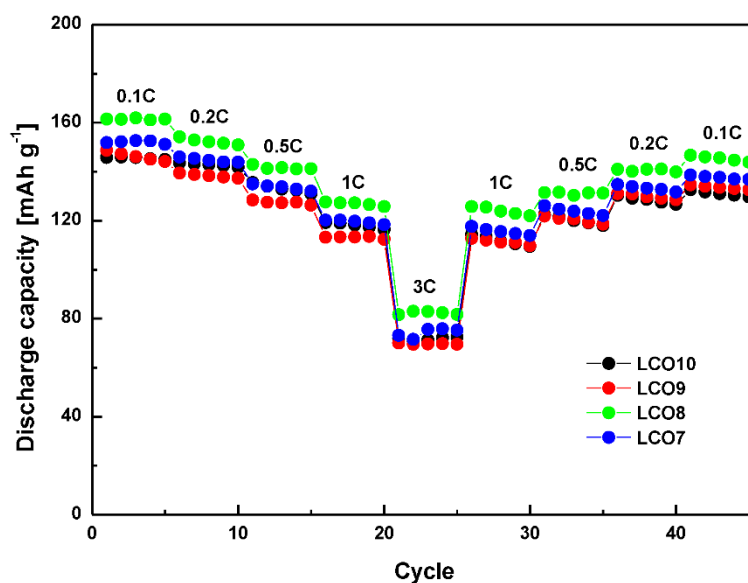

Figure 1. Rate capabilities of the prepared LCO + LVO hybrid cathodes.

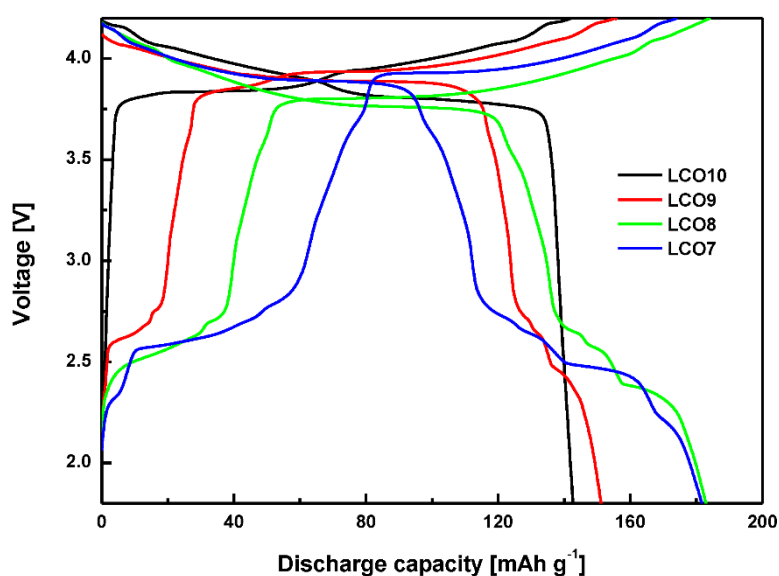

Figure 2. First-cycle voltage curves of the prepared LCO + LVO hybrid cathodes.

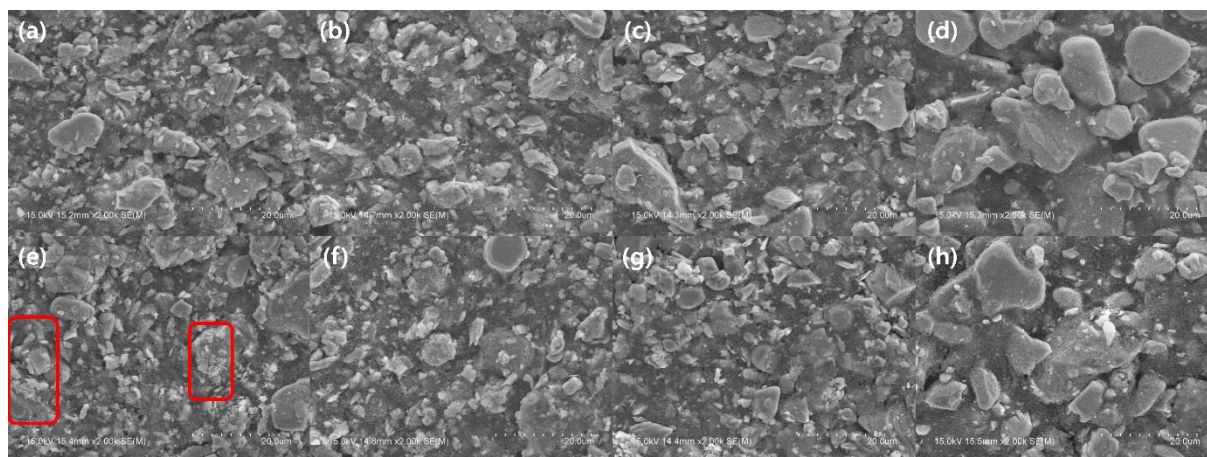

**Figure 3.** SEM images of the (a) LCO10, (b) LCO9, (c) LCO8, and (d) LCO7 electrode surfaces after cycling.
